# Supplementary material for: Synthesis, Characterization and USW Sensor of PEO/PMMA/PVP Doped with Zirconium Dioxide Nanoparticles
Source: Research Square preprint supplement (doi:10.21203/rs.3.rs-1003588/v1), 2021-10-26
Supplement: Supplementary file 1 [file 28217c35b289dacd037c267c.docx]

***Materials:*** PEO (6000 Mw and 99.8% assay purity) purchased from Reagent World, PMMA (5000 Mw and 99 % assay purity), purchased from DIDACTIC, PVP (Mw ˜ 40000 and 99.9% purity) purchased from Central Drug House, and ZrO2NPs purchased from (US Research Nanomaterials, Inc.) with average grain size (40 nm) and assay purity (99.9%).
